# Supplementary material for: A Surgical Safety Checklist to Reduce Morbidity and Mortality in a Global Population
Source: Atypon-hosted journal article supplement (doi:10.1056/nejmsa0810119), 2009-01-14
Supplement: nejm_haynes_491sa1.pdf [file nejm_haynes_491sa1.pdf]

## Supplementary Appendix

This appendix has been provided by the authors to give readers additional information about their work.

Supplement to: Haynes AB, Weiser TG, Berry WR, et al. A surgical safety checklist to reduce morbidity and mortality in a global population. *N Engl J Med* 2009;360:491-9. DOI: 10.1056/NEJMsa0810119.
